# 1 **Monoclonal anti-AMP-antibodies reveal broad and diverse AMPylation** 2 **patterns in cancer cells**

3 **Dorothea Höpfner<sup>1,2</sup>, Joel Fauser<sup>1,2</sup>, Marietta S. Kaspers<sup>1</sup>, Christian Pett<sup>3</sup>, Christian Hedberg<sup>3</sup>,**  
4 **Aymelt Itzen<sup>1,2,4</sup>**

5 1 Department of Biochemistry and Signaltransduction, University Medical Center Hamburg-  
6 Eppendorf (UKE), Martinistr. 52, 20246, Hamburg, Germany

7 2 Center for Integrated Protein Science Munich (CIPSM), Department Chemistry, Technical  
8 University of Munich, Lichtenbergstrasse 4, 85747, Garching, Germany

9 3 Chemical Biology Center (KBC), Department of Chemistry, Umeå University, Linnaeus väg  
10 10, 90187, Umeå, Sweden

11 4 Center for Structural Systems Biology (CSSB), University Medical Center Hamburg-  
12 Eppendorf (UKE), Hamburg, Germany

## 13 **Corresponding Authors**

14 Aymelt Itzen, [a.itzen@uke.de](mailto:a.itzen@uke.de)

15 Christian Hedberg, [christian.hedberg@umu.se](mailto:christian.hedberg@umu.se)

## 16 **Abstract**

17 AMPylation is a post-translational modification that modifies amino acid side chains with  
18 adenosine monophosphate (AMP). Recent progress in the field reveals an emerging role of  
19 AMPylation as a universal regulatory mechanism in infection and cellular homeostasis,  
20 however, generic tools to study AMPylation are required. Here, we describe three monoclonal  
21 anti-AMP antibodies (mAbs) from mouse which are capable of protein backbone independent  
22 recognition of AMPylation, in denatured (Western Blot) as well as native (ELISA, IP)  
23 applications, thereby outperforming previously reported tools. These antibodies are highly  
24 sensitive and specific for AMP modifications, highlighting their potential as tools for new  
25 target identification, as well as for validation of known targets. Interestingly, applying the anti-  
26 AMP mAbs to various cancer cell lines reveals a previously undescribed broad and diverse  
27 AMPylation pattern. In conclusion, the anti-AMP mAbs will aid the advancement of  
28 understanding AMPylation and the spectrum of modified targets.

29

## 30 Introduction

31 Post-translational modifications (PTMs) are diverse covalent alterations that modulate the  
32 activity, localization, stability, and specificity of proteins. One such PTM is AMPylation (also  
33 referred to as adenylation), occurring in prokaryotes as well as eukaryotes. Enzymes utilize  
34 adenosine triphosphate (ATP) as donor substrate to transfer the adenosine monophosphate  
35 (AMP) to hydroxyl-bearing amino acid side chains (e.g. tyrosine, serine, threonine) of a target  
36 protein, with pyrophosphate being released as a side product. There are three different  
37 classes of AMPylators or protein adenylyl transferases known to date: DNA- $\beta$ -Polymerase-like  
38 AMPylators with their most prominent member DrrA from *Legionella pneumophila*, FIC  
39 (*Filamentation induced by cyclic AMP*) enzymes represented by human HYPE/FICD (Engel et  
40 al., 2012), IbpA from *Histophilus somni* (Worby et al., 2009a), or VopS from *Vibrio*  
41 *parahaemolyticus* (Yarbrough et al., 2009), and - as most recent discovery - pseudokinases,  
42 specifically the highly conserved SelO (Sreelatha et al., 2018).

43 AMPylation has been studied over 50 years (Kingdon et al., 1967), and has gained recent  
44 attention with the identification of small GTPases as targets of AMPylating enzymes during  
45 various bacterial infections (Worby et al., 2009a; Yarbrough et al., 2009). The discovery of  
46 FICD/HYPE as the only mammalian FIC protein and its modification of the endoplasmic  
47 reticulum (ER) chaperone Bip (Engel et al., 2012; Ham et al., 2014) illustrates a role of  
48 AMPylation in protein homeostasis (Preissler et al., 2015, 2016; Sanyal et al., 2015). Recent  
49 findings on AMPylation by pseudokinases (Sreelatha et al., 2018) hints at a broader occurrence  
50 of this modification as a general mechanism, and not just in context of bacterial infections as  
51 previously thought.

52 However, despite a high prevalence of predicted FIC enzymes based on their conserved  
53 sequence, especially in pathogenic bacteria (Khater & Mohanty, 2015), only a limited amount  
54 of AMPylation targets is known. This discrepancy between number of enzymes and identified  
55 targets highlights the challenge of detecting AMPylation. Available tools are limited and  
56 associated with disadvantages when it comes to necessary resources and/or studying  
57 AMPylation in a physiologically relevant context. ATP analogs have reduced intracellular  
58 uptake (Plagemann & Wohlhueter, 1980) (although recent work established a cell permeable  
59 pronucleotide probe (Kielkowski et al., 2020)), are competed by the high endogenous amounts

60 of ATP, and hampered by the potential inability of enzymes to use these analogs as substrates.  
61 When used in cell lysates, spatial and temporal regulation is abrogated.

62 Antibodies targeting AMPylation could overcome many of these challenges as well as offer  
63 further applications as an orthogonal approach. Ideally, such an antibody would be able to  
64 detect AMPylation with high sensitivity and specificity in native as well as denatured proteins,  
65 thus enabling Western Blot (WB) detection as well as enrichment by IP. Previously generated  
66 polyclonal antibodies using AMPylated peptides do not fulfill the desired properties (Hao et  
67 al., 2011; Smit et al., 2011).

68 Here, we generate three new monoclonal antibodies from mice, recognizing AMPylation  
69 independently of the protein backbone, under denatured as well as native conditions. Besides  
70 validation of targets, they can serve as new tools for target identification. Since new target  
71 identification hinges on proper positive controls, and false negatives may not be detected, a  
72 thorough characterization of the antibodies' behavior in the specific application is crucial.

## 73 **Results**

74 Previously published and commercially available antibodies claimed to recognize AMPylated  
75 threonine and tyrosine, respectively, independent of the peptide backbone and protein  
76 environment (see Sigma-Aldrich 09-890 and ABS184)(Hao et al., 2011). However, evaluation  
77 of their performance in Western Blot on various recombinant proteins with different modified  
78 amino acid side chains [such as Rho GTPase Cdc42 AMPylated at threonine35 (VopS  
79 (Yarbrough et al., 2009)) or tyrosine32 (IbpA (Worby et al., 2009b)), respectively, Rab GTPase  
80 Rab1b modified at tyrosine77 (DrrA (Müller et al., 2010)), Histone H3.1 modified at threonine  
81 (HYPE (Truttmann et al., 2016)), the ER chaperone Bip/Grp-78 modified at threonine518 (HYPE  
82 (Preissler et al., 2015)) and the FIC enzyme HYPE/FICD auto-modified at  
83 threonine80,183+serine79 (Sanyal et al., 2015)] showed that they do not recognize all  
84 AMPylations (Figure 1A): While the commercially available anti-Thr-AMP antibody (Sigma-  
85 Aldrich 09-890) successfully recognized Cdc42-Thr-AMP and Hype-Thr-AMP, the detection of  
86 H3.1-Thr-AMP and Bip-Thr-AMP was less sensitive and in case of the latter no longer possible  
87 at 50 ng. The commercially available anti-Tyr-AMP antibody (ABS184, Merck) showed  
88 unsatisfactory performance by cross reacting with unmodified Rab1b and HYPE, respectively,  
89 as well as H3.1-Thr-AMP, in addition to exhibiting a generally weak detection signal. Since both  
90 anti-AMP antibodies did not yield broad recognition of AMPylation, we wondered whether

91 available anti-ADP-ribosylation antibodies might also be able to detect AMPylation, since both  
92 modifications share the AMP-moiety. We therefore tested the commercially available anti-  
93 pan-ADP-ribose binding reagent (MABE1016, Merck) and – while detecting mono-ADP-  
94 ribosylated PARP3 (by autocatalysis (Vyas et al., 2014)) - found it to be unable to detect  
95 AMPylation with the exception of H3.1-Thr-AMP.

96 This number of false positive and of false negative signals in commercially available anti-Tyr-  
97 AMP and anti-ADPR antibodies as well as the low sensitivity in the anti-Thr-AMP antibody led  
98 us to the development of new monoclonal anti-AMP antibodies in mice.

### 99 ***Design and synthesis of the AMP-bearing peptide***

100 Previous antibodies were used and worked mostly against denatured targets in WB, and were  
101 only evaluated against small GTPases (dependent on the peptide used for immunization) (Hao  
102 et al., 2011; Smit et al., 2011). Our goal was to create a universal tool that can recognize  
103 AMPylation, not only on the rising number of known AMPylated proteins but also on unknown  
104 targets independent of backbone and protein environment, in denatured as well as native  
105 applications. This would allow for target enrichment from complex samples as well as target  
106 validation and characterization.

107 Instead of using an AMPylated peptide derived from a naturally occurring target protein as  
108 hapten, we chose a reductive approach, that aimed to develop the antibody against the AMP-  
109 side chain moiety alone, but not against the peptide sequence itself (Figure 1B). The strategy  
110 was therefore to reduce the peptide backbone (Figure 1C) to a non-immunogenic 8 amino acid  
111 sequence of glycine and alanine, long enough to not unintentionally cause an immune reaction  
112 to the termini, but short enough to diminish the immune response to the peptide itself. To  
113 lower the charge at the termini and simulate a natural protein peptide backbone, the peptide  
114 was N-terminally acetylated and C-terminally amidated. The AMPylated threonine was  
115 introduced in the middle of the synthesized peptide via the use of an AMPylated building block  
116 (Albers et al., 2011; Smit et al., 2011). An N-terminal cysteine was incorporated to enable  
117 fusion to carrier proteins for immunization (Figure 1D).

118 Since this reductive strategy of AMPylated threonine incorporated into a short glycine-alanine  
119 backbone has never been tested before and posed the risk of abolishing immunogenicity, we  
120 decided on a broad approach, choosing two different carrier proteins as hapten conjugates  
121 and two different mice breeds for immunization. In total, 10 mice were immunized with either

122 bovine serum albumin (BSA) or keyhole limpet hemocyanin (KLH) conjugates, each of which  
123 was injected into three BALB/c and two C57 BL/6 mice by GenScript.

124 To ensure backbone independent recognition of AMPylation, antibody candidates were  
125 reversely selected by a stepwise screening procedure during all stages of development (Figure  
126 1E). The screening process started with all candidates that were able to recognize the hapten  
127 with its reduced backbone complexity, proceeding to filter all candidates that were capable of  
128 recognition of native threonine-AMPyated Cdc42 as determined by ELISA (Figure 1E, 1<sup>st</sup> step),  
129 and subsequently testing recognition of multiple modified proteins in denatured state via WB  
130 (Figure 1E, 2<sup>nd</sup> step). Only candidates positive for all these criteria and all target proteins were  
131 taken into consideration and used for further development (Supp. Figure S1).

132



133

134 **Figure 1: Motivation, hapten design and selection strategy for the generation of monoclonal anti-AMP antibodies.** **A**  
 135 Performance of commercially available AMP-antibodies. 50 ng of indicated recombinant protein was analyzed by WB using  
 136 anti-threonine-AMP (Merck) and anti-tyrosine-AMP (Merck) antibodies as well as anti-ADPR binding probe (Merck) as  
 137 indicated. **B** Reductive approach of hapten design. Instead of using intact AMPylated protein or AMPylated peptide from a  
 138 naturally occurring target such as Cdc42, the peptide backbone's complexity was reduced to ensure development of  
 139 antibodies against the AMP-moiety alone. **C** Representation of the peptide 31-38aa in naturally occurring Cdc42-Thr-AMP  
 140 with its complex side chains. **D** Representation of Thr-AMP hapten peptide with its reduced complexity of a glycine-alanine  
 141 backbone, N-terminal acetylation and C-terminal amidation. A N-terminal cysteine was included to enable fusion to carrier  
 142 protein. **E** Illustration of stepwise selection process of mice (sera), clones (supernatant), subclones (supernatant) and  
 143 confirmation of purified antibodies during antibody generation. Candidates were first subjected to ELISA against AMPylated  
 144 hapten peptide and AMPylated Cdc42-Thr, and positive clones evaluated for their performance in WB on various AMPylated  
 145 proteins.

146 Our selection strategy followed by rigorous characterization aimed to overcome the  
 147 aforementioned pitfalls of currently available antibodies and created three new antibodies  
 148 against AMPylation: One promising clone, 17G6, with sensitive recognition of all AMPylated  
 149 proteins in WB independent of their modified side chain, native recognition of Cdc42-Thr-AMP  
 150 in ELISA and low background was selected for subcloning and subsequent production and  
 151 purification. Another one, 7C11, was selected for showing a bias in WB for threonine modified  
 152 protein. One further clone, 1G11, was selected for its development of a Tyr-AMP-specific  
 153 recognition, despite immunization with a threonine-modified peptide. All monoclonal

154 antibodies derived from C57 BL/6 mice, where 17G6's hapten was fused to BSA while 7C11's  
155 and 1G11's haptens were KLH fusions (Supp. Figure S1).

156 ***Generated anti-AMP-antibodies are highly specific for AMPylation***

157 The three new anti-AMP antibodies 17G6, 7C11 and 1G11 were subsequently produced by  
158 roller bottle cell culture, purified from the supernatant via Protein A affinity capture, and tested  
159 for their performance in the recognition of denatured protein targets via WB. Here, sensitivity  
160 and detection limits, specificity towards AMPylation as opposed to incorporation of other  
161 nucleotides, and cross reactivity with other PTMs were evaluated. In addition, native binding  
162 as previously shown by ELISA was confirmed by protein complex formation between the  
163 antibodies and AMPylated antigens on size exclusion chromatography. In order to determine  
164 the detection limits of recognition (Figure 2A), we tested all three antibodies in WB on a  
165 dilution series of recombinant Cdc42-Tyr-AMP, -Thr-AMP, and Rab1-Tyr-AMP, respectively.  
166 They all showed similar performance on all targets and modified side chains: All three  
167 antibodies were able to recognize up to as little as 2 ng or even lower amounts of AMPylated  
168 protein. Antibody 1G11 detected modified Cdc42 at the Thr side chain with less sensitivity  
169 than at the Tyr side chain, and 7C11 detected Tyr modified GTPases with less sensitivity than  
170 Thr modified protein. Antibody 17G6 did not show a preference for a specific AMPylated side  
171 chain.

172 Next, we aimed to confirm backbone independent recognition of AMPylation by applying all  
173 three antibodies on a broad range of AMPylated targets (Figure 2B), and indeed, the  
174 recognition of AMPylation was not limited to small GTPases. In addition, AMPylated Hsp, Bip,  
175 and H3 were also recognized representing very different protein classes, sizes and folds. It  
176 therefore seems likely that other proteins will be recognized as well, which is a crucial  
177 prerequisite for target identification. Native binding of the antibodies to their modified  
178 antigens was investigated by complex formation with different AMPylated proteins using size  
179 exclusion chromatography (Figure 2E). The shift of retention time of the antibody peaks upon  
180 incubation with AMPylated proteins towards higher molecular weight but no shift for  
181 incubation with non-modified counterparts for all antibodies illustrates strong and specific  
182 binding of modified targets. The shifted antibody peaks were further collected by fractionation  
183 and analyzed by SDS PAGE for their co-elution with the antigens. Indeed, in case of AMPylated  
184 antigens, the antibodies co-eluted with their antigens. In this experiment, the same

185 preferences for side chains were observable as already deduced from studies by WB  
186 (denaturing conditions): Antibody 1G11 shows a preference for AMPylated tyrosine,  
187 exemplified by a striking peak shift upon Rab1-Tyr-AMP binding but little shift for Cdc42-Thr-  
188 AMP. Antibody 17G6 shows broad recognition of all modified targets, whereas 7C11 prefers  
189 threonine AMPylation and does not show binding of Rab1-Tyr-AMP (Supp. Figure S2). Notably,  
190 Rab1-Tyr-AMP appears to be a difficult antigen for native as well as denatured recognition by  
191 the new antibodies: Already during selection, Rab1-Tyr-AMP recognition in WB was one of the  
192 main hurdles for most candidates, and there were only few candidates who showed a strong  
193 signal in WB.

194 To test the antibodies' specificity towards the transferred nucleotide and their ability to  
195 differentiate AMPylation from e.g. GMPylation, recombinant IbpA was used to introduce  
196 UMPylation, GMPylation, CMPylation and TMPylation onto Cdc42 (Figure 2C). In addition, the  
197 recognition of two reactive ATP analogs that have been previously described in the context of  
198 AMPylation, N6-Propargyl-ATP (N6pATP) (Grammel et al., 2011; Yu et al., 2014) and 2'-Azido-  
199 2'-dATP (Wang & Silverman, 2016), was tested. All antibodies successfully differentiated  
200 between the nucleotides and specifically recognized AMPylation in Cdc42. Using ATP analogs  
201 instead of ATP, we could confirm that the antibodies are also sensitive to base and ribose  
202 modifications, and only antibodies 17G6 and 1G11 showed slight recognition of modified ATP-  
203 analogs (Figure 2C). This preference for AMPylation suggests a recognition of the adenine ring  
204 system by the antibodies.

205 After proving that the antibodies are sensitive and specific for AMPylation, we tested various  
206 other common PTMs for their ability to cross-react with the antibodies, to rule out false  
207 positive signals from competing modifications (Figure 2D). We tested phosphorylated (pS111)  
208 and phosphocholinated (PC-S76) Rab1b in direct comparison to its AMPylation, as well as  
209 biotinylated Rab8, trimethylated (me3K9) H3.1 in direct comparison to its AMPylation, and  
210 mono-ADP-ribosylated (MARylated) PARP3. To our satisfaction, the antibodies did not  
211 recognize phosphorylation, phosphocholination, biotinylation, or trimethylation on the  
212 chosen example proteins. However, the antibodies cross reacted with MARylation on PARP3,  
213 most likely recognizing the present adenosine moiety.

214



215

216 **Figure 2: Generated anti-AMP-antibodies are highly specific for AMPylation.** **A** Detection limits of AMPylated protein by the  
 217 mono-clonal anti-AMP antibodies in WB. Dilutions rows starting from 50 ng recombinant Cdc42-Thr-AMP, -Tyr-AMP and Rab1-  
 218 Tyr-AMP, respectively, were analyzed in WB using all three mono-clonal anti-AMP antibodies as indicated. **B** Broadness of  
 219 AMPylated target recognition by the mono-clonal anti-AMP antibodies in WB. 50 ng recombinant protein as indicated were  
 220 analyzed in WB using all three mono-clonal anti-AMP antibodies as indicated. **C** Evaluation of specificity towards AMPylation  
 221 by the mono-clonal anti-AMP antibodies in WB. IbpA was employed due to its ability to incorporate all indicated nucleotides  
 222 into Cdc42 as NMPylation. 50 ng recombinant Cdc42 modified with nucleotides as indicated were analyzed in WB using all  
 223 three mono-clonal anti-AMP antibodies as indicated. **D** Cross-reactivity with other PTMs by the mono-clonal anti-AMP  
 224 antibodies in WB was analyzed by blotting 50 ng of recombinant protein as indicated. All three mono-clonal anti-AMP  
 225 antibodies cross reacted with mono-ADP-Ribosylation (MAR) on PARP3. **E** Native binding of AMPylated Cdc42 by mono-clonal  
 226 anti-AMP antibody 17G6 analyzed by analytical SEC. 40  $\mu$ g antigen were mixed with 60  $\mu$ g antibody, including 50  $\mu$ M Vitamin  
 227 B12 as internal standard. In black antibody 17G6 alone, in blue antigen alone as indicated, in red co-incubation of antibody  
 228 17G6 and antigen as indicated. Shifted antibody peaks (red) were fractionated and analyzed for co-elution of antibody and  
 229 antigen by silver stained SDS PAGE.

230

231 ***Anti-AMP-antibodies can shift bias between AMPylation and MARYlation***

232 Our findings show that the developed anti-AMP-antibodies also detect mono-ADP-  
233 ribosylation as exemplified by auto-modified PARP3 (Figure 2D). We therefore screened  
234 different additives to the primary antibody incubation step during WB for their ability to  
235 abrogate reactivity with ADP-ribosylation, while keeping recognition of AMPylation intact  
236 (Figure 3A). Adenine, AMP, ADP, ATP, ADP-Ribose (ADPR) and nicotinamide adenine  
237 dinucleotide (NAD<sup>+</sup>) were selected for their similarity to both modifications and their potential  
238 ability to compete with binding of ADP-ribosylation or AMPylation and displace modified  
239 proteins. MnCl<sub>2</sub> and MgCl<sub>2</sub> as divalent cations were chosen for their ability to possibly complex  
240 the negatively charged diphosphate present in ADP-ribosylation but not AMPylation, thereby  
241 shielding negative charge that could potentially be relevant for antibody binding.  
242 Hydroxylamine treatment of the membrane after blotting reportedly results in specific  
243 cleavage of ADP-ribosylation at aspartate and glutamate side chains (Moss et al., 1983), but  
244 has not be previously tested regarding the stability of AMPylation. None of the tested  
245 additives were able to selectively reduce reactivity towards neither AMPylation nor  
246 MARYlation, without significantly reducing overall sensitivity of the antibodies at the same  
247 time. Nevertheless, AMP, ADP, ATP and NAD<sup>+</sup> were able to reduce AMPylation signals to some  
248 extent, while the MARYlation signal remained largely unaffected. However, keeping in mind  
249 that PARP3 has 14 reported auto-MARYlation sites (Vyas et al., 2014), whereas Cdc42 is single  
250 AMPylated, this loss of signal in AMPylation but not MARYlation might be due to the multiple  
251 modifications on MAR-PARP3 and therefore not be easily translatable towards other single  
252 ADP-ribosylated proteins, where these additives might also result in signal loss. As expected,  
253 hydroxylamine treatment resulted in a strong loss of MARYlation signal due to cleavage of the  
254 ADP-ribosyl group. By contrast, the AMPylation signal remained entirely unaffected. The  
255 residual signal of auto-modified PARP3 is most likely resulting from the two reported auto  
256 modification sites at lysin6 and lysin37 (Vyas et al., 2014) that will not be cleaved by  
257 hydroxylamine.

258 The addition of 1 mM MnCl<sub>2</sub> during the primary antibody incubation step, while not affecting  
259 signal intensity, resulted in a significantly reduced background. Strikingly, the addition of  
260 MnCl<sub>2</sub> also resulted in a sharply enhanced tyrosine specificity for antibody 1G11 in the  
261 presence of MnCl<sub>2</sub> (Figure 3C). The addition of MnCl<sub>2</sub> was therefore further evaluated in  
262 regard to the previously tested detection limits of the antibodies. We confirmed that the

263 detection limits of antibodies 17G6 and 7C11 towards AMPylated antigens was not  
264 significantly changed by addition of  $MnCl_2$ , while 1G11's ability to detect Thr-AMP-Cdc42 was  
265 greatly diminished (Figure 3B).

266 In summary, our newly developed antibodies are a combined tool for detection of AMPylation  
267 and mono-ADP-ribosylation. By addition of  $MnCl_2$  to the primary antibody incubation steps in  
268 WB, the background of the antibodies can be significantly reduced and 1G11 shows  
269 pronounced tyrosine specificity. By hydroxylamine treatment of membranes after blotting,  
270 glutamate and aspartate linked ADP-ribosylation can be cleaved while AMPylation remains  
271 unaffected. Therefore, the combination of all three antibodies with addition of  $MnCl_2$  and  
272 hydroxylamine treatment results in a tool-kit, which is able to sensitively detect ADP-  
273 ribosylation and AMPylation, to differentiate between the two, and in case of AMPylation to  
274 recognize not only targets in general but also to give information on their modified side chains.

275



276

277 **Figure 3: Anti-AMP-antibodies can shift bias between detection of AMPylation and MARYlation.** **A** Recognition of  
 278 AMPylation vs. MARYlation by antibody 17G6 can be fine-tuned using additives as indicated during primary antibody  
 279 incubation or hydroxylamine treatment. 50 ng recombinant Cdc42-Thr-AMP, -Tyr-AMP as well as mono-ADP-ribosylated  
 280 PARP3 as indicated were analyzed in WB. Additives as indicated, with the exception of hydroxylamine, were added during  
 281 incubation with primary anti-AMP antibody. Hydroxylamine treatment to cleave off ADP-ribosylation at Asp and Glu took  
 282 place for blotting before primary antibody incubation. **B** Detection limits under the influence of 1 mM MnCl<sub>2</sub>. Dilutions rows  
 283 starting from 50 ng recombinant Cdc42-Thr-AMP, -Tyr-AMP and Rab1-Tyr-AMP, respectively, were analyzed in WB using all  
 284 three monoclonal anti-AMP antibodies as indicated in the presence of 1 mM MnCl<sub>2</sub>. **C** Addition of 1 mM MnCl<sub>2</sub> reduces  
 285 antibody background and causes antibody 1G11 to regain tyrosine-AMP specificity. 50 ng recombinant protein as indicated  
 286 were analyzed in WB using all three monoclonal anti-AMP antibodies as indicated.

287 ***Generated anti-AMP-antibodies recognize diverse cellular AMPylation***

288 After thorough characterization and evaluation of our produced antibodies on purified and  
289 mass spectrometry (MS) confirmed antigens, we next evaluated the antibody performance on  
290 cell lysates in known contexts under denatured as well as native conditions. The reproduction  
291 of previous results with these new tools is crucial for the trust in future findings and a smooth  
292 transition from previously used tools.

293 Previously, it could be shown that Bip AMPylation by HYPE is lost in cells upon stimulation of  
294 endoplasmic reticulum (ER) stress e.g. by thapsigargin (Ham et al., 2014; Preissler et al., 2015).  
295 Cycloheximide, in contrast, will stall protein production, therefore relieving the ER of protein  
296 load, causing a significant increase in Bip AMPylation. We reproduced these findings –  
297 representative for all our antibodies - with antibody 17G6 and  $MnCl_2$  as additive in Cho-K1  
298 cells (Figure 4A + B) and could confirm these previously published results. In order to verify  
299 that the antibodies' previously confirmed ability to bind native AMPylated protein would  
300 translate into a successful immunoprecipitation (IP), we applied the antibodies in the same  
301 context of Bip AMPylation (Figure 4B and 5C). Using our antibody 17G6, we successfully  
302 performed an immunoprecipitation of AMPylated Bip, first as recombinant protein (Figure  
303 4B), and afterwards from thapsigargin and cycloheximide treated CHO-K1 cells (Figure 4C),  
304 respectively. Using recombinant Bip and Bip-AMP we can show that immunoprecipitation is  
305 dependent on the presence of antibody 17G6 and specific for AMPylation, the non-modified  
306 Bip is not precipitated. The detection of a successful IP from cell lysates was hampered by the  
307 detection limit of the anti-Bip antibody, which did not recognize Bip at less than 50 ng per  
308 lane. With detection limits of the anti-AMP antibodies far lower, the detected band by the  
309 anti-AMP antibody 17G6 in untreated CHO-K1 whole cell lysates (in WB, Figure 4A) might  
310 correspond to less than 5 ng in 20  $\mu$ g loaded lysate, while the less sensitive anti-Bip antibody  
311 leads to a more pronounced signal. Therefore, we had to assume that the percentage of  
312 AMPylated Bip in the untreated CHO-K1 cell lysates was very low. Consequently, AMPylation  
313 was stimulated by cycloheximide treatment in order to create enough pulldown material for  
314 detection with anti-Bip antibody, resulting in a band intensity of Bip-AMP comparable to 50 ng  
315 in 20  $\mu$ g loaded whole cell lysate using the anti-AMP antibody 17G6 (Figure 4C).

316 The successful immunoprecipitation of endogenous amounts of AMPylated Bip from cell  
317 lysates shows potential for future target identification by IP, especially in combination with  
318 MS.

319 After the thorough characterization of our antibodies' performance in WB, we asked the  
320 question whether these sensitive tools were able to detect new AMPylation bands in cell  
321 lysates. We therefore screened a number of available immortalized and cancer cell lines for  
322 occurrence of AMPylation bands using our newly developed monoclonal antibodies (Figure  
323 4D and Supplemental Figure S4). And indeed, our anti-AMP antibodies were able to detect a  
324 multitude of bands in the range of 58-245 kDa and 11-22 kDa. Strikingly, some bands differed  
325 among cell lysates, while others were distinctive and reoccurring. While some cell lines such  
326 as THP-1 show very little to no AMPylation signals, other cell lines such as HeLa, HEK293 and  
327 Jurkat cells show strong AMPylation signals, especially in the region of 11-22 kDa. Treatment  
328 of membranes with hydroxylamine to cleave off ADP-ribosylation at aspartate and glutamate  
329 residues does not significantly diminish these bands. Furthermore, these bands are not  
330 detected by the anti-pan-ADPR binding reagent (Merck), or tyrosine specific anti-AMP  
331 antibody 1G11 (see Figure S4), but both anti-AMP antibodies 7C11 and 17G6, strongly  
332 suggesting AMPylation at threonine residues. Another reoccurring band at 70 kDa, most likely  
333 representing Bip-AMP, is strongly differing in intensity among cell lysates: While H1299, THP-  
334 1, Jurkat and Huvec cells do not show this band at all, it is strongly represented in HeLa, HROC-  
335 24 and SKOV cells.

336



337

338 **Figure 4: Generated anti-AMP-antibodies recognize diverse cellular AMPylation.** A Reproduction of previously published  
 339 data confirms loss of Bip-AMPylation upon ER stress by thapsigargin in WB. 20 µg treated (as indicated) ChoK1 cell lysate per  
 340 lane or 50 ng recombinant Bip-AMP were analyzed in WB by antibody 17G6 and anti-Bip antibody. B Successful IP with  
 341 antibody 17G6 on recombinant BIP-AMP confirms that antibody 17G6 is AMP-specific. C Successful IP of endogenous Bip-  
 342 AMP with antibody 17G6 from treated (as indicated) ChoK1 cell lysates confirms applicability in immunoprecipitation. 50 ng  
 343 recombinant Bip-AMP were blotted as control. D Using antibody 17G6 on various immortalized and cancer cell lines reveals  
 344 diverse cellular AMPylation. 20 µg cell lysate per lane as indicated were blotted and probed with antibody 17G6 using 1 mM  
 345 MnCl<sub>2</sub> as additive. Afterwards cells were treated with 1 M hydroxylamine to cleave ADP-ribosylation at aspartate and  
 346 glutamate residues and reprobed with antibody 17G6 using 1 mM MnCl<sub>2</sub>. Antibodies against Bip, GAPDH and Histone H3  
 347 serve as loading control.

## 348 Discussion

349 Here, we report and characterize three new monoclonal anti-AMP antibodies recognizing  
 350 AMPylation independent of the protein backbone. In order to reduce the inherent batch to

351 batch variability of the previously published polyclonal antibodies, as well as generate defined  
352 specificities, we created monoclonal antibodies in mice. The reproducibility crisis of antibodies  
353 in recent years (Baker, 2015), as well as the limitations of commercially available anti-  
354 AMPylation-antibodies (Hao et al., 2011) (Sigma-Aldrich ABS184 and 09-890) let us to perform  
355 a thorough evaluation of the new monoclonal antibodies' performance in two different  
356 applications. For denatured recognition, we tested sensitivity, specificity, and cross reactivity  
357 of our antibodies in Western Blots. For native recognition, we studied complex formation of  
358 the antibody with different modified targets by size exclusion chromatography, as well as  
359 confirmed native binding in an immunoprecipitation experiment. The antibodies were  
360 generated with the help of an AMPylated synthetic peptide with reduced backbone  
361 complexity. A major bottle neck in antibody generation based on synthesized peptides, which  
362 is also reported for the generation of other anti-PTM antibodies such as anti-phospho  
363 antibodies (Archuleta et al., 2011), is the phenomenon of predominantly positive peptide  
364 ELISA readings against modified hapten, that do not translate to a positive WB performance.  
365 Common procedure is to only select via ELISA against the modified hapten. According to  
366 Archuleta et al. (Archuleta et al., 2011), this method selects antibodies, whose performance  
367 fails in other applications in 25-50% of cases. However, in our selection process we observed  
368 a high correlation between positive ELISA readings against modified protein, which we  
369 performed in addition to peptide ELISA, and good WB performance. The inclusion of a native  
370 AMPylated protein in form of Cdc42-Thr-AMP in the ELISA screening process allowed us to  
371 generate monoclonal antibodies combined with efficient preselection of candidates before  
372 WB evaluation. We therefore recommend including native modified protein in the ELISA  
373 screening process for all anti-PTM-antibodies.

374 First efforts in the creation of anti-AMP antibodies were undertaken in 1984 by fusing AMP  
375 directly to the carrier protein BSA (Chung & Rhee, 1984), thus generating murine monoclonal  
376 antibodies that were purified from ascitic fluid and employed in the purification of AMPylated  
377 glutamine synthetase. Later on, other antibodies were accidentally produced by aiming for  
378 ADP-ribose antibodies, where the hapten was degraded to contain AMP, resulting in  
379 antibodies recognizing free 5'-AMP (Bredehorst et al., 1978; Meyer & Hilz, 1986). Hao et al.  
380 (Hao et al., 2011) achieved polyclonal antibodies by immunization of rabbits with a synthetic  
381 seven amino acid long Rac1-peptide containing a threonine AMPylation (now commercially  
382 available as Anti-pan-AMPylation Threonine Antibody 09-890, Sigma-Aldrich Merck). After

383 depletion with tyrosine-AMPylation protein the serum was reported to detect threonine  
384 AMPylation independently of protein backbone and structure, in WB as well as IP. The most  
385 recent antibody was produced by an AMPylated Rab1b peptide of 13 amino acids coupled to  
386 KLH in rabbit, resulting in polyclonal serum, aided again by efficient synthesis of AMPylated  
387 peptides (Smit et al., 2011). However, both published rabbit antibodies are hampered by low  
388 sensitivity, and little characterization, especially concerning cross reactivity with other PTMs  
389 and recognition of targets outside the protein class of small GTPases or Bip is published. In  
390 addition, all recently developed antibodies are polyclonal, with the accompanying challenges  
391 of batch to batch reproducibility and reliability of tool development on basis of that antibody.  
392 Considering the special challenges connected with the generation of antibodies that target  
393 PTMs (Hattori & Koide, 2018), and their necessity for extensive characterization, polyclonal  
394 antibodies are not an ideal choice. A stringent retesting of every new batch regarding proper  
395 AMP-recognition and lack of cross reactivity would have to be performed before application  
396 to cell lysates. Previous antibodies therefore represented no general recognition tool of  
397 AMPylation, especially if searching for new targets and effects, where the number of potential  
398 false negative or false positive findings would render them unreliable. Our experiments show  
399 that all commercially available anti-AMP antibodies offer no broad recognition of targets,  
400 despite claiming to recognize AMPylation backbone independently, and are exhibiting a  
401 significant amount of false positive and negative reactions in our in-house testing. The  
402 limitations in performance and cross reactivity of both anti-ADPR-reagents and anti-  
403 AMPylation antibodies in combination causes the danger of false positives for ADP-  
404 ribosylation as well as false negatives in AMPylated proteins, and a bias in AMPylation  
405 research towards small GTPases and threonine modifications (Figure 1A). As many researchers  
406 lack suitable positive and negative controls of protein of interest, these performance failures  
407 might never be detected.

408 Little is known about AMPylation in eukaryotic cells outside the modification of Bip in the  
409 context of ER stress. In accordance with recent publications (Kielkowski et al., 2020; Sreelatha  
410 et al., 2018), the application of our new monoclonal antibodies to cell lysates of immortalized  
411 and cancer cell lines hint at a much stronger prevalence of AMPylation than perceived for a  
412 long time. The limited number of tools, especially in medium to high throughput, has  
413 hampered reliable detection of AMPylation in cellular systems. Our antibodies expand the  
414 available toolbox by offering sensitive detection and enrichment of AMPylation, at the same

415 time requiring little resources that might hamper applicability in a standard laboratory. They  
416 therefore open new opportunities in an expanding research field. The recent antibody  
417 “reproducibility crisis” especially in regards to antibodies targeting PTMs (Baker, 2015;  
418 Egelhofer et al., 2011) suggested a thorough characterization of the AMPylation-specificity  
419 and sensitivity of our new monoclonal antibodies in the applications WB, ELISA and IP. With  
420 their high sensitivity and broad target recognition, they overcome the limitations of previously  
421 published anti-AMP antibodies and create opportunities for new target identification and  
422 study of cellular AMPylation. Our data suggest that they can successfully be used for  
423 enrichment of AMPylated proteins and peptides for mass spectrometry to overcome the  
424 limitation of low occurrence of AMPylation in proteomic studies. As all three monoclonal  
425 antibodies are sequenced, thereby enabling recombinant antibody production, they form a  
426 good basis for long-term reproducibility in AMPylation research.

427

## 428 Materials and Methods

429 **Table 1: Strategy for monoclonal anti-AMP antibody generation in mice. Experiments were conducted as indicated as a**  
 430 **service by GenScript, Piscataway Township, New Jersey.**

| Stage                                          | Description                                                                                                                                                                                                                                                                                                                                       | Shipment                                 |
|------------------------------------------------|---------------------------------------------------------------------------------------------------------------------------------------------------------------------------------------------------------------------------------------------------------------------------------------------------------------------------------------------------|------------------------------------------|
| Immunogen preparation                          | Peptide conjugation with KLH and BSA.                                                                                                                                                                                                                                                                                                             | -                                        |
| Phase I: Immunization                          | Group A: 3 BALB/c +2 C57 mice, immunization with KLH conjugates, Group B: 3 BALB/c +2 C57 mice, immunization with BSA conjugates, Immunization with conventional protocol, indirect ELISA primary screening with target peptide (AcNH-CGAGT(AMP)GAG-NH <sub>2</sub> ), and confirmatory screening by indirect ELISA by target protein (Cdc42-AMP) | 15µl sera of 10 animals                  |
| Phase II: Cell fusion                          | 2 cell fusions, indirect ELISA primary screening with target peptide (AcNH-CGAGT(AMP)GAG-NH <sub>2</sub> ), and confirmatory screening by indirect ELISA by target protein (Cdc42-AMP)                                                                                                                                                            | Supernatants of 10 clones, 2ml per clone |
| Phase III: Subcloning, Screening and Expansion | 3 cell lines subcloning, indirect ELISA primary screening with target peptide (AcNH-CGAGT(AMP)GAG-NH <sub>2</sub> ), and confirmatory screening by indirect ELISA by target protein (Cdc42-AMP)                                                                                                                                                   | 2 vials and 5ml supernatant per subclone |
| Antibody production                            | 1 L roller bottle cell culture and protein A purification, indirect ELISA primary screening with target peptide (AcNH-CGAGT(AMP)GAG-NH <sub>2</sub> ), and confirmatory screening by indirect ELISA by target protein (Cdc42-AMP)                                                                                                                 | >15mg purified antibody per subclone     |

### 431 **Solid phase peptide synthesis (SPPS)**

432 The peptides S2 and S3 (Supplemental Figure S5) were synthesized on a MultiSyntech Syro I  
 433 automated peptide synthesizer, using Tentagel Rink-amide resin as solid phase employing 8  
 434 equivalents of amino acid and 7.8 equivalents HBTU, 7.8 equivalents HOBT and 16 equivalents  
 435 DIPEA in DMF. Threonine-AMP building block S1 (Smit et al., 2011) was manually coupled  
 436 according to below. The resin was pre-swollen by treatment with DCM (15 min). Removal of  
 437 Fmoc protecting group was performed by treatment with 2 times 3 minutes followed by 1  
 438 time 9 minutes 20 vol% piperidine in DMF. The resin was washed with DMF three times. The  
 439 building block S1 (1.7 equivalents) was coupled using 1.6 equivalents HATU, 1.6 equivalents  
 440 HOAt and 3.5 equivalents DIPEA in DMF. The coupling reaction was allowed to proceed for 4 h  
 441 at room temperature. N-terminal acetyl-capping was achieved by adding 50 equivalents acetic  
 442 anhydride and 50 equivalents DIPEA in NMP to the resin (1 h), followed by washing with DMF.  
 443 Before cleavage, the resin was washed thoroughly with DCM (5 times), isopropanol (5 times)  
 444 and diethyl ether (5 times). The peptides were cleaved with 5% TIPS and 5% water in TFA (1 x  
 445 2 h + 2 x 10 min). An additional 10% water was added to the combined TFA-fractions and  
 446 allowed to age for one hour, in order to ensure complete hydrolysis of the acetonide moiety.  
 447 The cleavage mixture was evaporated to dryness *in vacuo*. The resulting solid was dissolved in

448 a minimum TFA and precipitated by the addition of 10 ml ice cold diethyl ether. The precipitate  
449 was dissolved in water/acetonitrile and subsequently lyophilized overnight. Pure peptides  
450 were obtained after purification by preparative HPLC. Preparative HPLC purifications of the  
451 peptides were performed with an Agilent 1260 Infinity series instrument equipped with a  
452 Phenomenex Luna (5  $\mu\text{m}$ , C18(2) 100  $\text{\AA}$ , 250 x 21.2 mm) column. Used mobile phases were  
453 water with 0.1% TFA (eluent A) and acetonitrile with 0.1% TFA (eluent B). Analytical HRMS-  
454 HPLC was performed on an Agilent 1290 Infinity II series instrument equipped with an Agilent  
455 Extend (1.8  $\mu\text{m}$ , C18, 100  $\text{\AA}$ , 50 x 2.1 mm) column and connected to an Agilent 6230 TOF LC/MS  
456 instrument. Used mobile phases were water with 0.1% FA (eluent A) and acetonitrile with  
457 0.1% FA (eluent B). For complete description see supplement.

#### 458 ***Immunogen preparation***

459 Immunogen peptide S2 (ACNH-CGAGT(AMP)GAG-NH<sub>2</sub>) was conjugated with KLH and BSA as  
460 immunogen via its N-terminal cysteine (GenScript).

#### 461 ***Immunization***

462 3 BALB/c and 2 C57 BL/6 mice were immunized with either S2 conjugated to KLH (group A,  
463 BALB/c mice #8534 - #8536 and C57 BL/6 mice #8537 - #8538) or BSA (group B, BALB/c mice  
464 #8539 - #8541 and C57 BL/6 mice #8542 - #8543), respectively, according to the conventional  
465 protocol of GenScript (Table 2), resulting in 10 immunized mice in total.

466 **Table 2: Immunization schedule**

| Procedure            | Schedule                 | Dosage and route               | Adjuvant |
|----------------------|--------------------------|--------------------------------|----------|
| Pre-Immune Bleed     | T= - 4 days              |                                |          |
| Primary Immunization | T= 0 days                | 50 $\mu\text{g}$ /animal, i.p. | CFA      |
| Boost 1              | T= 14 days               | 25 $\mu\text{g}$ /animal, i.p. | IFA      |
| Test Bleed 1         | T= 21 days               |                                |          |
| Boost 2              | T= 28 days               | 25 $\mu\text{g}$ /animal, i.p. | IFA      |
| Test Bleed 2         | T= 35 days               |                                |          |
| Final Boost          | T= 50 $\pm$ 7 days       | 25 $\mu\text{g}$ /animal, i.p. | IFA      |
| Cell Fusion          | 4 days after final boost |                                |          |

467 Test bleed: 7 days after each boost immunization, immunized animal sera were tested by  
468 indirect ELISA and competitive ELISA for immune response by GenScript. Western Blot

469 evaluation of pre-sera and sera after 3rd immunization against 200 ng of purified protein/lane  
470 using a 1:1000 dilution was performed in-house as described. Animals #8538 (group A) and  
471 #8542 (group B), both C57 BL/6 mice, were selected for phase II.

472 ***Phase II: cell fusion and screening***

473 For cell fusion and clone plating, two fusions were performed by electro-fusion. The average  
474 fusion efficiency at GenScript is around 1 hybridoma/2,000 splenocytes, thus the anticipated  
475 hybridoma clones would be  $\sim 2 \times 10^4$ . All fused cells from each cell fusion were plated into 96-  
476 well plates. Up to 15 plates were used for each fusion. For the primary binder screening, the  
477 conditioned medium was screened by ELISA with the target peptide. In the confirmatory  
478 screening, the conditioned medium of primary binder screening positive clones were screened  
479 against the positive screening material (Cdc42-Thr-AMP) and counter screening material  
480 (Cdc42). The expected clones should be positive against target peptides, positive screening  
481 material while negative against the negative peptide and counter screening material. For  
482 clone expansion and freezing, 10 positive clones were expanded into 24-well plates. 2 ml of  
483 supernatant (conditioned media) were collected for each clone and cells were frozen down to  
484 avoid clone loss (GenScript). The conditioned media of all 10 positive clones were analyzed in-  
485 house by WB against 200 ng of purified protein/lane using a 1:10 dilution as described. Clones  
486 17G6 (#8542), 1G11 and 7C11 (#8538) were selected for phase III.

487 ***Phase III: subcloning, screening, expansion.***

488 For subcloning, 3 positive primary clones were sub-cloned by limiting dilution to ensure that  
489 the sub-clones were derived from a single parental cell. The clones were carried for a  
490 maximum of 3 generations. Subcloning was screened by ELISA as before. For monoclonal  
491 cryopreservation, two stable sub-clonal cell lines of each parental clone were chosen for  
492 cryopreservation based on the result of ELISA (GenScript). Positive cell supernatants were  
493 evaluated by WB against 200 ng of purified protein/lane using a 1:10 dilution in-house as  
494 described. The stable sub-clonal cell lines 17G6-1 (isotype IgG2b, k), 1G11-F3-3 (isotype IgG2b,  
495 k) and 7C11-1 (isotype IgG2a, k) were chosen for production and isotyped, and the cell lines  
496 stored with 2 vials at GenScript and 2 vials in-house. They were negatively tested for  
497 mycoplasma, detected by the PCR Mycoplasma Detection Set (TAKARA BIO INC, Kusatsu,  
498 Japan).

499 **Antibody production**

500 Three stable sub-clonal cell lines were each cultured in 1 l roller bottle cell culture using  
501 SFM + 2 % low IgG FBS culture medium. Monoclonal antibody was Protein A purified from the  
502 supernatant and stored in phosphate buffered saline (PBS, pH 7.4) with 0.02 % sodium azide  
503 as preservative. Purity was measured by SDS-PAGE and concentration by NanoDrop  
504 Spectrophotometer A280nm (Thermo Fisher Scientific Inc., Waltham, Massachusetts)  
505 (GenScript). This way 36.38 mg of 7C11 with 95% purity, 17.10 mg 17G6 with 91 % purity and  
506 30.99 mg 1G11 with 92% purity were produced.

507 **Molecular biology**

508 Unless otherwise indicated, all genes were codon optimized for expression in *E. coli* by  
509 omitting rare amino acid codons, and all cloning was done by sequence and ligation  
510 independent cloning (SLIC) using T4 DNA polymerase (New England Biolabs, Ipswich,  
511 Massachusetts).

512 The human Cdc42 1-179aa Q61L (referred to as Cdc42)-encoding DNA was cloned into a  
513 modified pGEX-4T-1 vector (GE Healthcare, Chicago, Illinois) as previously described  
514 (Barthelmes et al., 2020), resulting in a construct with a N-terminal glutathione S-transferase  
515 (GST) tag followed by the Tobacco Etch Virus (TEV) protease cleavage site. As previously  
516 described (Schoebel et al., 2009), the human Rab1b 3-174aa (referred to as Rab1b)-encoding  
517 DNA was cloned into a modified pMAL vector (New England Biolabs), resulting in a construct  
518 with a N-terminal hexahistidine (6xHis) tag, followed by maltose-binding protein (MBP) and  
519 the TEV protease cleavage site. The human Bip 19-654aa (referred to as Bip)-encoding DNA  
520 was cloned into a modified pProEx™-HTb vector (Thermo Fisher Scientific Inc.), resulting in a  
521 construct with a N-terminal 6xHis tag, followed by the TEV protease cleavage site. The human  
522 Hype 102-458aa E234G (referred to as Hype)-encoding DNA was cloned into a modified pMAL  
523 vector (New England Biolabs), resulting in a construct with a N-terminal 6xHis tag, followed by  
524 the HaloTag®, the TEV protease cleavage site and a Strep-tag® II. The *Vibrio parahaemolyticus*  
525 VopS 31-387aa (referred to as VopS)-encoding DNA was cloned into a modified pMAL vector  
526 (New England Biolabs) as previously described (Barthelmes et al., 2020), resulting in a  
527 construct with a N-terminal 6xHis tag, followed by MBP and the TEV protease cleavage site.  
528 The *Histophilus somni* lbpA 3483-3797aa I3455C (referred to as lbpA)-encoding DNA was  
529 cloned into a modified pSF vector (Oxford Genetics Ltd, Oxford, UK), resulting in a construct

530 with a N-terminal decahistidine (10xHis) tag, followed by MBP, the TEV protease cleavage site  
531 and a 3xFLAG<sup>®</sup> tag. The *Legionella pneumophila* DrrA 8-533aa (referred to as DrrA)-encoding  
532 DNA was cloned into a modified pET19 vector (Merck Millipore, Burlington, Massachusetts)  
533 as previously described (Müller et al., 2010), resulting in a construct with a N-terminal 6xHis  
534 tag and the TEV protease cleavage site. The *Legionella pneumophila* AnkX 1-800aa (referred  
535 to as AnkX)-encoding DNA, which previously had been amplified from *Legionella pneumophila*  
536 genomic DNA (Goody et al., 2012), was cloned into a modified pSF vector (Oxford Genetics) as  
537 previously described (Ernst et al., 2020), resulting in a construct with a N-terminal 10xHis tag,  
538 followed by enhanced green fluorescent protein (eGFP) and the TEV protease cleavage site.  
539 Human Rab8a 6-176aa (referred to as Rab8a)-encoding DNA was cloned into a pet51b(+)  
540 vector (Merck Millipore), resulting in a construct with a N-terminal Strep<sup>®</sup> II tag and  
541 enterokinase cleavage site and a C-terminal 10xHis tag. All site-specific mutagenesis was  
542 performed with the Q5 Site-Directed Mutagenesis Kit (New England Biolabs).

#### 543 **Recombinant expression and purification of proteins**

544 Recombinant human histone H3.1 was purchased from New England Biolabs (M2503S), and  
545 active human PARP3 from Sigma-Aldrich, St. Louis, Missouri (SRP0194-10UG, Lot  
546 #8050330111). Human pSer111 Rab1b was a kind gift of Dr. Sophie Vieweg and was produced  
547 as published before (Vieweg et al., 2020).

548 Cdc42, VopS, Rab1b, DrrA and AnkX were expressed and purified as previously described  
549 (Barthelmes et al., 2020; Ernst et al., 2020; Müller et al., 2010; Schoebel et al., 2009).

550 In brief, plasmids were transformed into chemically competent BL21 (DE3) cells (Cdc42,  
551 Rab1b, IbpA) or Lemo21 cells (VopS) or BL21-CodonPlus (DE3)-RIL cells (DrrA, Rab8a, AnkX) or  
552 Rosetta 2 cells (Bip, HYPE) and protein was expressed in LB medium after induction with  
553 0.5 mM isopropyl- $\beta$ -dithiogalactopyranoside (IPTG) for 20 h at 25 °C (Cdc42, Rab1b) or 20 °C  
554 (VopS, DrrA, Rab8a, AnkX, IbpA) or 23 °C (HYPE) or 3 h at 37 °C (Bip). Cells were harvested,  
555 washed with PBS and lysed in 50 mM 4-(2-hydroxyethyl)-1-piperazineethanesulfonic acid  
556 (Hepes) pH 7.5, 500 mM sodium chloride (NaCl), 1 mM MgCl<sub>2</sub>, 2 mM  $\beta$ -mercaptoethanol  
557 ( $\beta$ Me), 10  $\mu$ M guanosine diphosphate (GDP), 1 mM PMSF (Cdc42, Rab1b, Rab8a) or 50 mM  
558 Tris pH 8.0, 500 mM NaCl, 5% (v/v) glycerol, 2 mM  $\beta$ -Me, 1 mM PMSF (AnkX) or 50mM Hepes  
559 pH 7.5, 500 mM NaCl, 1 mM MgCl<sub>2</sub>, 2mM  $\beta$ Me, 1 mM PMSF (VopS, HYPE) or 50 mM Hepes pH  
560 8.0, 500 mM lithium chloride (LiCl), 2 mM  $\beta$ -Me, 1 mM PMSF (DrrA, IbpA) or 50 mM Hepes pH

561 7.4, 400 mM NaCl, 20 mM imidazole, 1 mM PMSF (Bip) after addition of DNase I by French  
562 press at 1.8 kbar. The lysates were cleared by centrifugation.

563 For GST-tagged proteins (Cdc42), the lysate was loaded onto a pre-equilibrated GST-Trap  
564 column (GE) and eluted with 3-5 column volumes (CV) of the same buffer supplemented with  
565 10 mM glutathione.

566 For His-tagged proteins (VopS, Rab1b, DrrA, Bip, HYPE, Rab8a, IbpA), the lysate was loaded  
567 onto a pre-equilibrated Ni<sup>2+</sup>-charged Bio-Scale Mini Nuvia IMAC Cartridge (Bio-Rad  
568 Laboratories, Hercules, California), washed with 30 mM imidazole and eluted with a  
569 fractionated gradient from 30 mM – 350 mM imidazole over 20 CV.

570 The protein containing eluate was digested with 6x-His tagged TEV during dialysis against  
571 50 mM Hepes pH 7.5, 100 mM NaCl, 2 mM βMe, 10 μM GDP (Cdc42, Rab1b) or 20 mM Hepes  
572 pH 8.0, 100 mM NaCl, 2 mM β-Me (DrrA, IbpA) or 20 mM Tris pH 8.0, 300 mM NaCl, 5% (v/v)  
573 glycerol, 2 mM β-Me (AnkX) 20 mM Hepes pH 7.4, 100 mM NaCl (Bip) or 20 mM Hepes pH 7.4,  
574 100 mM NaCl, 1 mM MgCl<sub>2</sub>, 1 mM βMe (HYPE) with a cut off of MW 6000-8000 (Serva) for 16h  
575 at 4°C.

576 Digested, formerly His-tagged proteins (Rab1b, DrrA, Bip, HYPE, AnkX, IbpA) were reapplied  
577 to the Ni<sup>2+</sup>-charged column pre-equilibrated with dialysis buffer in order to remove the His-  
578 tag, uncleaved protein and TEV protease. The flow through was collected, concentrated and  
579 applied to a HiLoad™ 16/600 Superdex™ 75pg column (GE Healthcare) in 20 mM Hepes pH  
580 7.5, 50 mM NaCl, 1 mM MgCl<sub>2</sub>, 1 mM dithioerythritol (DTE), 10 μM GDP (Rab1b) or 20 mM  
581 Hepes pH 8.0, 100 mM NaCl, 2 mM DTE (DrrA) or 20 mM Tris pH 8.0, 300 mM NaCl, 5% (v/v)  
582 glycerol, 1 mM β-Me (AnkX) or 20 mM Hepes pH 7.4, 150 mM potassium chloride (KCl), 1 mM  
583 MgCl<sub>2</sub>, 1 mM tris(2-carboxyethyl)phosphine (TCEP), 5% glycerol (HYPE) or 20 mM Hepes pH  
584 8.0, 100 mM NaCl, 1 mM MgCl<sub>2</sub>, 2 mM DTE (IbpA) or applied to a HiLoad™ 16/600 Superdex™  
585 200pg column (GE Healthcare) in 20 mM Hepes pH 7.4, 150 mM KCl, 10 mM MgCl<sub>2</sub> (Bip). For  
586 VopS and Rab8a, protein containing eluate was concentrated and applied to a HiLoad™ 16/600  
587 Superdex™ 75pg column (GE Healthcare) in 20 mM Hepes pH 7.5, 100 mM NaCl, 1 mM MgCl<sub>2</sub>,  
588 1 mM DTT (VopS) or 20 mM Hepes pH 7.5, 50 mM NaCl, 1 mM MgCl<sub>2</sub>, 1 mM DTE, 10 μM GDP  
589 (Rab8a) without TEV digestion. For digested, formerly GST-tagged proteins (Cdc42), protein  
590 digestion was concentrated and applied to a HiLoad™ 16/600 Superdex™ 75pg column (GE  
591 Healthcare) in 20 mM Hepes pH 7.5, 50 mM NaCl, 1 mM MgCl<sub>2</sub>, 1 mM DTE, 10 μM GDP  
592 (Cdc42). During all steps of protein purification, fractions were collected and analyzed by

593 Coomassie blue stained sodium dodecyl sulfate (SDS) polyacrylamide gel electrophoresis  
594 (PAGE). Fractions containing pure protein of interest were pooled, concentrated to around 10  
595 mg/ml, snap-frozen in liquid nitrogen and stored in multiple aliquots at -80 °C.

#### 596 ***In vitro AMPylation of recombinant proteins***

597 For Cdc42-Thr-AMP, 200 µM Cdc42 were incubated with 10 µM VopS in the presence of  
598 800 µM ATP in 20 mM Hepes pH 7.5, 100 mM NaCl, 1 mM MgCl<sub>2</sub>, 1 mM DTE at 20 °C  
599 overnight. For Cdc42-Tyr-AMP, 10 µM Cdc42 were incubated with 0.1 µM IbpA in the presence  
600 of 1 mM ATP in 20 mM HEPES pH 7.4, 100 mM NaCl, 1 mM MgCl<sub>2</sub>, 1 mM TCEP, 10 µM GDP at  
601 20 °C overnight. For Rab1-Tyr-AMP, 10 µM Rab1b were incubated in the presence of 50 µM  
602 ATP and 0.1 µM DrrA at 25°C as previously described (Müller et al., 2010). AMPylated Cdc42  
603 and Rab1b were purified by size exclusion chromatography on a HiLoad™ 16/600 Superdex™  
604 75pg column (GE Healthcare) in 20 mM Hepes pH 7.5, 50 mM NaCl, 1 mM MgCl<sub>2</sub>, 1 mM DTE,  
605 10 µM GDP and full AMPylation was confirmed by MS.

606 For H3-Thr-AMP and auto-AMPylated HYPE, 30 µM H3.1 were incubated with 25 µM HYPE in  
607 the presence of 10 mM ATP in 20 mM HEPES pH 7.5, 150 mM NaCl, 1 mM MgCl<sub>2</sub>, 2 mM DTT  
608 at 20 °C overnight. For Bip-Thr-AMP, 50 µM BiP were incubated with 2.5 µM HYPE in the  
609 presence of 1.5 mM ATP in 25 mM Hepes pH 7.4, 100 mM KCl, 4 mM MgCl<sub>2</sub>, 1 mM calcium  
610 chloride (CaCl<sub>2</sub>) for 2 h at 30 °C. Bip-AMP was purified with Protino™ Ni-NTA Agarose  
611 (Macherey-Nagel, Düren, Germany) in previously listed buffers according to the  
612 manufacturer's instructions.

#### 613 ***In vitro NMPylation of recombinant Cdc42 by IbpA***

614 10 µM Cdc42 were incubated with 0.1 µM IbpA in the presence of 0.5 mM of either CTP, UTP,  
615 TTP, GTP, N6pATP (Jena Bioscience, Jena, Germany) and 2'-Azido-2'-dATP (TriLink  
616 BioTechnologies, San Diego, California) in 20 mM Tris-HCl pH 7.4, 100 mM NaCl, 1 mM MgCl<sub>2</sub>,  
617 1 mM TCEP, 10 µM GDP at 20 °C overnight. Successful NMPylation was confirmed by MS.

#### 618 ***In vitro auto-mono-ADP-ribosylation of PARP3***

619 500 ng PARP-3 (Sigma-Aldrich) were incubated at 25°C in a 100 µL reaction volume in 20 mM  
620 HEPES pH 8.0, 5 mM MgCl<sub>2</sub>, 5 mM CaCl<sub>2</sub>, 0.01 % NP-40, 25 mM KCl, 1 mM DTT, 0.1 mg/mL  
621 salmon sperm DNA (Thermo Fisher Scientific), 0.1 mg/mL BSA (New England Biolabs) in the  
622 presence of 250 µM NAD<sup>+</sup> for 30 minutes as published before (Gibson et al., 2017). The  
623 reaction was stopped by the addition of 5x SDS-PAGE Loading Buffer, followed by heating to  
624 95°C for 5 min.

625 ***In vitro phosphocholination of Rab1b by AnkX***

626 10  $\mu$ M Rab1b was incubated with 0.1  $\mu$ M AnkX in the presence of 1 mM CDP-choline (Enzo  
627 Life Sciences, Farmingdale, New York) for 2 h at 23 °C as published before (Goody et al., 2012).

628 ***In vitro biotinylation of Rab8a***

629 200 mM EZ-Link® Maleimide-PEG2-Biotin (Thermo Fisher Scientific) stock solution in DMSO  
630 was diluted 1:10 in 1x PBS to a final concentration of 20 mM Maleimide-PEG2-Biotin label.  
631 200  $\mu$ M Maleimide-PEG2-Biotin label were added to 100  $\mu$ M of Rab8a in PBS for 2 h on ice,  
632 before Rab8a was washed 3 times with PBS in an Amicon filter (Merck Millipore, 10 kDa  
633 NMWL). Incorporation of label was confirmed by MS.

634 ***Analytical size exclusion chromatography (aSEC)***

635 In 100  $\mu$ l, 40  $\mu$ g antigen were mixed with 60  $\mu$ g antibody, including 50  $\mu$ M Vitamin B12 as  
636 internal standard. 90  $\mu$ l sample were injected onto a Superdeep 10/300 200pg column (GE  
637 Healthcare) coupled to a Prominence HPLC system (Shimadzu, Kyōto, Japan) and run at 0.5  
638 ml/min for 60 min in 20 mM HEPES pH 7.5, 150 mM NaCl. Protein retention times were  
639 detected at 280 nm (A280nm), and intensities were normed to Vitamin B12. Peaks containing  
640 antigen:antibody complexes were collected in 500  $\mu$ l fractions. Fractions were supplemented  
641 with 6x Laemmli and concentrated in a SpeedVac alpha RVC (Martin Christ  
642 Gefriertrocknungsanlagen GmbH, Osterode am Harz, Germany) without heat to 200  $\mu$ l.  
643 10  $\mu$ l concentrated fractions were analyzed by 15% SDS PAGE and silver stained.

644 ***Mass spectrometry***

645 To verify the degree of modification, samples containing 100 ng recombinant protein were  
646 run over a 5  $\mu$ m Jupiter C4 300Å LC column (Phenomenex, Torrance, California) using the 1260  
647 Infinity LC system (Agilent Technologies, Santa Clara, California) and then subjected to mass  
648 spectrometry with the 6100 Quadrupole LC/MS System (Agilent Technologies). The resulting  
649 ion spectra were deconvoluted using the Magic Transformer (MagTran) software (Zhang &  
650 Marshall, 1998).

651 ***Western Blotting***

652 200 ng or 50 ng recombinant protein as indicated or 20  $\mu$ g cell lysate, respectively, were  
653 separated by SDS-PAGE and protein was transferred to MeOH-activated Immobilon®-P  
654 membrane (Merck Millipore) using Whatman paper and a transfer buffer of 48 mM Tris, 39  
655 mM glycine, 1.3 mM SDS, 20% methanol. For the blotting procedure, a constant current of 0.7

656 mA/cm<sup>2</sup> was applied to the V20-SDP semi-dry blotter (SCIE-PLAS, Cambourne, UK) for 2 h.  
657 After blotting, the PVDF membrane was blocked with Roti®-Block (Carl Roth, Karlsruhe,  
658 Germany) in Tris-buffered saline containing 0.1% Tween20 (TBS-T) for 1 h. Subsequently, the  
659 primary antibody was added to the blocking solution and incubated overnight at 4°C.  
660 Afterwards, the membrane was washed three times with TBS-T for 10 minutes and then  
661 incubated with a secondary antibody-peroxidase conjugate in TBS-T for 1 h. Again, the  
662 membrane was washed in TBS-T three times for 10 min, before the peroxidase signal was  
663 developed with the SuperSignal™ West Dura (Thermo Fisher Scientific) and  
664 chemoluminescence was detected using the Intas ECL Chemocam (Intas Science Imaging  
665 Instruments, Göttingen, Germany). Antibodies: Mouse pre-immune serum and antiserum  
666 after 3<sup>rd</sup> immunization (GenScript) was used 1:1000. Cell supernatant from hybridoma clones  
667 and subclones (GenScript) was used 1:10. Purified monoclonal mouse anti-AMP antibodies  
668 17G6, 1G11, 7C11 (GenScript) were used 1:1000 at 0.5 µg/ml. Monoclonal mouse anti-GAPDH  
669 sc-47724 (Santa Cruz Biotechnology, Dallas, Texas) was used 1:1000. Polyclonal rabbit anti-  
670 histone H3 antibody ab1791 (Abcam, Cambridge, UK) was used 1:5000. Polyclonal rabbit anti-  
671 AMPylated Tyrosine Antibody ABS184 (Merck Millipore) was used 1:1000. Polyclonal rabbit  
672 anti-pan-AMPylated Threonine Antibody 09-890 (Sigma-Aldrich) was used 1:2000.  
673 Recombinant rabbit anti-pan-ADP-ribose binding reagent MABE1016 (Merck Millipore) was  
674 used 1:1000. Polyclonal rabbit anti-GRP78/Bip antibody PA5-34941 (Thermo Fisher Scientific)  
675 was used 1:5000. Secondary goat anti-mouse IgG (H + L) HRP conjugate (Thermo Fisher  
676 Scientific) was used 1:20000. Secondary goat anti-rabbit IgG HRP (Sigma-Aldrich) was used  
677 1:40000. Additives as indicated were added during the primary antibody incubation step at a  
678 final concentration of 1 µM for adenosine (Jena Bioscience), AMP (Sigma-Aldrich), ADP  
679 (Biosynth Carbosynth, Staad, Switzerland), ATP (Biosynth Carbosynth), ADPR (Sigma-Aldrich),  
680 NAD<sup>+</sup> (Biosynth Carbosynth) or 1 mM for MnCl<sub>2</sub>, MgCl<sub>2</sub> (VWR International, Radnor,  
681 Pennsylvania) respectively. Hydroxylamine treatment was performed as previously described  
682 (Gibson et al., 2017). In short, after development of membrane with anti-AMP antibodies, the  
683 membrane was incubated with 1 M hydroxylamine (Sigma-Aldrich) in blocking solution for 8 h  
684 at room temperature, washed three times in TBS-T, blocked again for 1 h at room  
685 temperature, and proceeded with a second round of anti-AMP antibody probing.  
686 All Western Blots on recombinant proteins were performed as technical duplicates. Analysis  
687 of cell lysate samples was performed as biological duplicate. Representative blots are shown.

688 **Cell culture**

689 Chok-K1 FlpIn cells (Thermo Fisher Scientific) were cultured in RPMI-1640 medium (Sigma-  
690 Aldrich) supplemented with 10% FBS (Thermo Fisher Scientific). 90% confluent cells were  
691 stimulated by either 0.5  $\mu$ M thapsigargin (Biosynth Carbosynth) for 2 h or 100  $\mu$ g/ml  
692 cycloheximide (Sigma-Aldrich) for 4 h. Cells were washed twice with Dulbecco's Phosphate  
693 Buffered Saline (DPBS) (Sigma-Aldrich) and lysed in RIPA buffer (Thermo Fisher Scientific)  
694 supplemented with cOmplete EDTA free protease inhibitor (Roche, Basel, Switzerland).  
695 Protein concentration was determined using the BCA assay (Thermo Fisher Scientific).

696 For analysis of cell lysates, SKOV3-cells were cultured in McCoy's 5A Medium supplemented  
697 with 10% FCS (Thermo Fisher Scientific). HROC24-cells were cultured in DMEM/Ham's F12  
698 (Thermo Fisher Scientific) supplemented with 10% FCS and 3 mM glutamine (Thermo Fisher  
699 Scientific). Jurkat subclone JMP cells were cultured in RPMI (Thermo Fisher Scientific)  
700 supplemented with 10% NCS (Thermo Fisher Scientific). Huvec cells were cultured in Medium  
701 199 without phenol red (Thermo Fisher Scientific) supplemented with 6.6 % FCS and 33 %  
702 EBM™-2 Endothelial Cell Growth Basal Medium-2 (Lonza, Basel, Switzerland). HELA cells  
703 (DSMZ ACC-57) and HEK293 cells (DSMZ ACC-305) were cultured in DMEM (Thermo Fisher  
704 Scientific) supplemented with 10% FCS. THP-1 cells (ATCC TIB-202) were cultured in RPMI  
705 supplemented with 10% FCS. Cells were washed in DPBS (Sigma-Aldrich), before being lysed  
706 in M-PER buffer (Thermo Fisher Scientific) supplemented with protease inhibitor cOmplete  
707 EDTA-free (Roche) and Phosphatase Stop (Roche). Protein concentration was determined  
708 using the Bradford assay (Thermo Fisher Scientific).

709 **Immunoprecipitation**

710 AMPylated proteins were precipitated from purified recombinant Bip and Bip-AMP or Cho-K1  
711 lysates stressed with either thapsigargin or cycloheximide with antibody 17G6 using Pierce  
712 ChIP-grade Protein A/G Magnetic Beads (Thermo Fisher Scientific) according to the  
713 manufacturer's protocol. In short, in a total volume of 500 $\mu$ l 20  $\mu$ g recombinant protein or  
714 1 mg total protein lysate were incubated with 10  $\mu$ g 17G6 antibody in 25 mM Tris pH 7.4,  
715 150 mM NaCl, 1 mM EDTA, 5 % glycerol, 1 % NP40 overnight, before being precipitated with  
716 25  $\mu$ l equilibrated beads. AMPylated proteins were eluted with 100  $\mu$ l 1x Laemmli for 15 min  
717 at 30 °C. Lysate elutions were concentrated to 20 $\mu$ l in a SpeedVac alpha RVC (Christ) without  
718 heat. For recombinant protein samples 7.5  $\mu$ l each of input and unbound sample

719 supplemented with 5x Laemmli buffer and 2.5  $\mu$ l elution, for lysate samples 5  $\mu$ l each of input  
720 and unbound sample supplemented with 6x Laemmli buffer and 20  $\mu$ l of concentrated elution  
721 were analyzed by 12% SDS PAGE and WB as described.

722

## 723 **Acknowledgements**

724 SKOV3-cells were a kind gift of Leticia Oliveira-Ferrer, Department of Gynecology, University  
725 Medical Centre Hamburg-Eppendorf. HROC24-cells were a kind gift of Yuan-Na Lin,  
726 Department of General, Visceral and Thoracic Surgery, University Medical Centre Hamburg-  
727 Eppendorf. Jurkat cells, subclone JMP (DMSZ verified), and ChoK1-FlpIn cells were a kind gift  
728 of Ralf Fliegert, Institute of Biochemistry and Molecular Cell Biology, University Medical Centre  
729 Hamburg-Eppendorf. HUVEC cells isolated from umbilical cords were a kind gift of Volker  
730 Huck, Centre for Internal Medicine / Diagnostics, University Medical Centre Hamburg-  
731 Eppendorf in cooperation with Kurt Hecher, Department of Obstetrics and Fetal Medicine,  
732 University Medical Centre Hamburg-Eppendorf. Dorothea Höpfner was supported by a PhD  
733 scholarship of the Konrad-Adenauer-Stiftung. We are grateful to the Knut and Alice  
734 Wallenberg Foundation, Sweden (KAW 2013.0187 to C.H.), and the Swedish Research Council  
735 (VR) for generous support.

## 736 **Competing interests**

737 The authors declare that they have no competing interests.

## 738 **References**

- 739 Albers, M. F., Van Vliet, B., & Hedberg, C. (2011). Amino acid building blocks for efficient Fmoc  
740 solid-phase synthesis of peptides adenylated at serine or threonine. *Organic Letters*,  
741 *13*(22), 6014–6017. <https://doi.org/10.1021/ol2024696>
- 742 Archuleta, A. J., Stutzke, C. A., Nixon, K. M., & Browning, M. D. (2011). Optimized Protocol to  
743 Make Phospho-Specific Antibodies that Work. In Alexander E. Kalyuzhny (Ed.), *Signal*  
744 *Transduction Immunohistochemistry: Methods and Protocols, Methods in Molecular*  
745 *Biology* (Vol. 717, pp. 69–88). Springer Science+Business Media.  
746 <https://doi.org/10.1007/978-1-61779-024-9>
- 747 Baker, M. (2015). Blame it on the antibodies. *Nature*, *521*(7552), 274–276.  
748 <https://doi.org/10.1038/521274a>
- 749 Barthelmes, K., Ramcke, E., Kang, H. S., Sattler, M., & Itzen, A. (2020). Conformational control  
750 of small GTPases by AMPylation. *Proceedings of the National Academy of Sciences of the*  
751 *United States of America*, *117*(11), 5772–5781.  
752 <https://doi.org/10.1073/pnas.1917549117>

- 753 Bredehorst, R., Ferro, A. M., & Hilz, H. (1978). Production of Antibodies against ADP-ribose  
754 and 5'-AMP with the Aid of N6-Carboxymethylated ADP-ribose Conjugates. *European*  
755 *Journal of Biochemistry*, 82(1), 105–113. [https://doi.org/10.1111/j.1432-](https://doi.org/10.1111/j.1432-1033.1978.tb12001.x)  
756 1033.1978.tb12001.x
- 757 Chung, H. K., & Rhee, S. G. (1984). Separation of glutamine synthetase species with different  
758 states of adenylation by chromatography on monoclonal anti-AMP antibody affinity  
759 columns. *Proceedings of the National Academy of Sciences of the United States of*  
760 *America*, 81(15), 4677–4681. <https://doi.org/10.1073/pnas.81.15.4677>
- 761 Egelhofer, T. A., Minoda, A., Klugman, S., Lee, K., Kolasinska-Zwierz, P., Alekseyenko, A. A.,  
762 Cheung, M. S., Day, D. S., Gadel, S., Gorchakov, A. A., Gu, T., Kharchenko, P. V., Kuan, S.,  
763 Latorre, I., Linder-Basso, D., Luu, Y., Ngo, Q., Perry, M., Rechtsteiner, A., ... Lieb, J. D.  
764 (2011). An assessment of histone-modification antibody quality. *Nature Structural and*  
765 *Molecular Biology*, 18(1), 91–94. <https://doi.org/10.1038/nsmb.1972>
- 766 Engel, P., Goepfert, A., Stanger, F. V., Harms, A., Schmidt, A., Schirmer, T., & Dehio, C. (2012).  
767 Adenylation control by intra- or intermolecular active-site obstruction in Fic proteins.  
768 *Nature*, 482(7383), 107–110. <https://doi.org/10.1038/nature10729>
- 769 Ernst, S., Ecker, F., Kaspers, M. S., Ochtrop, P., Hedberg, C., Groll, M., & Itzen, A. (2020).  
770 *Legionella* effector AnkX displaces the switch II region for Rab1b phosphocholination.  
771 *Science Advances*, 6(20), eaaz8041. <https://doi.org/10.1126/sciadv.aaz8041>
- 772 Gibson, B. A., Conrad, L. B., Huang, D., & Kraus, W. L. (2017). Generation and Characterization  
773 of Recombinant Antibody-like ADP-Ribose Binding Proteins. *Biochemistry*, 56(48), 6305–  
774 6316. <https://doi.org/10.1021/acs.biochem.7b00670>
- 775 Goody, P. R., Heller, K., Oesterlin, L. K., Müller, M. P., Itzen, A., & Goody, R. S. (2012). Reversible  
776 phosphocholination of Rab proteins by Legionella pneumophila effector proteins. *EMBO*  
777 *Journal*, 31(7), 1774–1784. <https://doi.org/10.1038/emboj.2012.16>
- 778 Grammel, M., Luong, P., Orth, K., & Hang, H. C. (2011). A Chemical Reporter for Protein  
779 AMPylation. *J Am Chem Soc*, 133(43), 17103–17105.  
780 [https://doi.org/doi:10.1021/ja205137d](https://doi.org/10.1021/ja205137d)
- 781 Ham, H., Woolery, A. R., Tracy, C., Stenesen, D., Krämer, H., & Orth, K. (2014). Unfolded protein  
782 response-regulated Drosophila Fic (dFic) protein reversibly AMPylates BiP chaperone

- 783 during endoplasmic reticulum homeostasis. *The Journal of Biological Chemistry*, 289(52),  
784 36059–36069. <https://doi.org/10.1074/jbc.M114.612515>
- 785 Hao, Y. H., Chuang, T., Ball, H. L., Luong, P., Li, Y., Flores-Saaib, R. D., & Orth, K. (2011).  
786 Characterization of a rabbit polyclonal antibody against threonine-AMPylation. *Journal*  
787 *of Biotechnology*, 151(3), 251–254. <https://doi.org/10.1016/j.jbiotec.2010.12.013>
- 788 Hattori, T., & Koide, S. (2018). Next-generation antibodies for post-translational modifications.  
789 In *Current Opinion in Structural Biology* (Vol. 51, pp. 141–148). Elsevier Ltd.  
790 <https://doi.org/10.1016/j.sbi.2018.04.006>
- 791 Khater, S., & Mohanty, D. (2015). In silico identification of AMPylating enzymes and study of  
792 their divergent evolution. *Scientific Reports*, 5, 10804.  
793 <https://doi.org/10.1038/srep10804>
- 794 Kielkowski, P., Buchsbaum, I. Y., Kirsch, V. C., Bach, N. C., Drukker, M., Cappello, S., & Sieber,  
795 S. A. (2020). FICD activity and AMPylation remodelling modulate human neurogenesis.  
796 *Nature Communications*, 11(1), 1–13. <https://doi.org/10.1038/s41467-019-14235-6>
- 797 Kingdon, H. S., Shapiro, B. M., & Stadtman, E. R. (1967). Regulation of glutamine synthetase,  
798 VIII. ATP: glutamine synthetase adenyltransferase, an enzyme that catalyzes alterations  
799 in the regulatory properties of glutamine synthetase. *Proceedings of the National*  
800 *Academy of Sciences of the United States of America*, 58(4), 1703–1710.  
801 <https://doi.org/10.1073/pnas.58.4.1703>
- 802 Meyer, T., & Hiltz, H. (1986). Production of anti-(ADP-ribose) antibodies with the aid of a  
803 dinucleotide-pyrophosphatase-resistant hapten and their application for the detection  
804 of mono(ADP-ribosyl)ated polypeptides. *European Journal of Biochemistry*, 155(1), 157–  
805 165. <https://doi.org/10.1111/j.1432-1033.1986.tb09471.x>
- 806 Moss, J., Yost, D. A., & Stanley, S. J. (1983). Amino acid-specific ADP-ribosylation. *The Journal*  
807 *of Biological Chemistry*, 258(10), 6466–6470.
- 808 Müller, M. P., Peters, H., Blümer, J., Blankenfeldt, W., Goody, R. S., & Itzen, A. (2010). The  
809 Legionella Effector Protein DrrA AMPylates the Membrane Traffic Regulator Rab1b.  
810 *Science*, 329(5994), 946–949. <https://doi.org/10.1126/science.1192276>
- 811 Plagemann, P. G. W., & Wohlhueter, R. M. (1980). Permeation of Nucleosides, Nucleic Acid  
812 Bases, and Nucleotides in Animal Cells. *Current Topics in Membranes and Transport*,  
32 of 47

- 813 14(C), 225–330. [https://doi.org/10.1016/S0070-2161\(08\)60118-5](https://doi.org/10.1016/S0070-2161(08)60118-5)
- 814 Preissler, S., Rato, C., Chen, R., Antrobus, R., Ding, S., Fearnley, I. M., & Ron, D. (2015).  
815 AMPylation matches BiP activity to client protein load in the endoplasmic reticulum.  
816 *ELife*, 4, e12621. <https://doi.org/10.7554/eLife.12621>
- 817 Preissler, S., Rato, C., Perera, L. A., Saudek, V., & Ron, D. (2016). FICD acts bifunctionally to  
818 AMPylate and de-AMPylation the endoplasmic reticulum chaperone BiP. *Nature Structural*  
819 *& Molecular Biology*, 24(1), 23–29. <https://doi.org/10.1101/071332>
- 820 Sanyal, A., Chen, A. J., Nakayasu, E. S., Lazar, C. S., Zbornik, E. A., Worby, C. A., Koller, A., &  
821 Mattoo, S. (2015). A novel link between fic (filamentation induced by cAMP)-mediated  
822 adenylation/AMPylation and the unfolded protein response. *Journal of Biological*  
823 *Chemistry*, 290(13), 8482–8499. <https://doi.org/10.1074/jbc.M114.618348>
- 824 Schoebel, S., Oesterlin, L. K., Blankenfeldt, W., Goody, R. S., & Itzen, A. (2009). RabGDI  
825 Displacement by DrrA from Legionella Is a Consequence of Its Guanine Nucleotide  
826 Exchange Activity. *Molecular Cell*, 36(6), 1060–1072.  
827 <https://doi.org/10.1016/j.molcel.2009.11.014>
- 828 Smit, C., Blümer, J., Eerland, M. F., Albers, M. F., Müller, M. P., Goody, R. S., Itzen, A., &  
829 Hedberg, C. (2011). Efficient Synthesis and Applications of Peptides containing  
830 Adenylylated Tyrosine Residues. *Angewandte Chemie International Edition*, 50(39),  
831 9200–9204. <https://doi.org/10.1002/anie.201103203>
- 832 Sreelatha, A., Yee, S. S., Lopez, V. A., Park, B. C., Kinch, L. N., Pilch, S., Servage, K. A., Zhang, J.,  
833 Jiou, J., Karasiewicz-Urbańska, M., Łobocka, M., Grishin, N. V., Orth, K., Kucharczyk, R.,  
834 Pawłowski, K., Tomchick, D. R., & Tagliabracci, V. S. (2018). Protein AMPylation by an  
835 Evolutionarily Conserved Pseudokinase. *Cell*, 175(3), 809–821.e19.  
836 <https://doi.org/10.1016/j.cell.2018.08.046>
- 837 Truttmann, M. C., Cruz, V. E., Guo, X., Engert, C., Schwartz, T. U., & Ploegh, H. L. (2016). The  
838 *Caenorhabditis elegans* Protein FIC-1 Is an AMPylase That Covalently Modifies Heat-  
839 Shock 70 Family Proteins, Translation Elongation Factors and Histones. *PLoS Genetics*,  
840 12(5), 1–26. <https://doi.org/10.1371/journal.pgen.1006023>
- 841 Vieweg, S., Mulholland, K., Brauning, B., Kacharia, N., Lai, Y.-C., Toth, R., Singh, P. K., Volpi, I.,  
842 Sattler, M., Groll, M., Itzen, A., & Muqit, M. M. K. (2020). PINK1-dependent

- 843 phosphorylation of Serine111 within the SF3 motif of Rab GTPases impairs effector  
844 interactions and LRRK2 mediated phosphorylation at Threonine72. *Biochemical Journal*.  
845 <https://doi.org/10.1042/bcj20190664>
- 846 Vyas, S., Matic, I., Uchima, L., Rood, J., Zaja, R., Hay, R. T., Ahel, I., & Chang, P. (2014). Family-  
847 wide analysis of poly(ADP-ribose) polymerase activity. *Nature Communications*, 5, 4426.  
848 <https://doi.org/10.1038/ncomms5426>
- 849 Wang, P., & Silverman, S. K. (2016). DNA-Catalyzed Introduction of Azide at Tyrosine for  
850 Peptide Modification. *Angewandte Chemie - International Edition*, 55(34), 10052–10056.  
851 <https://doi.org/10.1002/anie.201604364>
- 852 Worby, C. A., Mattoo, S., Kruger, R. P., Corbeil, L. B., Koller, A., Mendez, J. C., Zekarias, B., Lazar,  
853 C., & Dixon, J. E. (2009a). The Fic Domain: Regulation of Cell Signaling by Adenylylation.  
854 *Molecular Cell*, 34(1), 93–103. <https://doi.org/10.1016/j.molcel.2009.03.008>
- 855 Worby, C. A., Mattoo, S., Kruger, R. P., Corbeil, L. B., Koller, A., Mendez, J. C., Zekarias, B., Lazar,  
856 C., & Dixon, J. E. (2009b). The Fic Domain: Regulation of Cell Signaling by Adenylylation.  
857 *Molecular Cell*, 34(1), 93–103. <https://doi.org/10.1016/j.molcel.2009.03.008>
- 858 Yarbrough, M. L., Li, Y., Kinch, L. N., Grishin, N. V., Ball, H. L., & Orth, K. (2009). AMPylation of  
859 Rho GTPases by Vibrio VopS disrupts effector binding and downstream signaling. *Science*,  
860 323(5911), 269–272. <https://doi.org/10.1126/science.1166382>
- 861 Yu, X., Woolery, A. R., Luong, P., Hao, Y. H., Grammel, M., Westcott, N., Park, J., Wang, J., Bian,  
862 X., Demirkan, G., Hang, H. C., Orth, K., & LaBaer, J. (2014). Copper-catalyzed azide-alkyne  
863 cycloaddition (click chemistry)-based Detection of Global Pathogen-host AMPylation on  
864 Self-assembled Human Protein Microarrays. *Molecular and Cellular Proteomics*, 13(11),  
865 3164–3176. <https://doi.org/10.1074/mcp.M114.041103>
- 866 Zhang, Z., & Marshall, A. G. (1998). A universal algorithm for fast and automated charge state  
867 deconvolution of electrospray mass-to-charge ratio spectra. *Journal of the American*  
868 *Society for Mass Spectrometry*, 9(3), 225–233. [https://doi.org/10.1016/S1044-](https://doi.org/10.1016/S1044-0305(97)00284-5)  
869 [0305\(97\)00284-5](https://doi.org/10.1016/S1044-0305(97)00284-5)
- 870
- 871



## 873 **Supplement**

### 874 ***Antibody generation and selection of antibodies binding to native epitopes***

875 After three boosts, the sera of immunized mice were evaluated for their ability to recognize  
876 the peptide hapten conjugate and native Cdc42-Thr-AMP in ELISA. Only positive hits were  
877 evaluated for their WB performance on various AMPylated proteins to check for backbone  
878 independent recognition and potential side chain bias. Of ten immunized mice, five of these  
879 were able to recognize native Cdc42-Thr-AMP in ELISA as good as the AMPylated hapten  
880 without showing binding of Cdc42 alone. All of them were positive against all tested proteins  
881 in WB, although no preference for AMPylation at threonine side chains was observable and  
882 all sera reacted with tyrosine as well as threonine modifications.

883 After the final bleed two positive animals, both C57 BL/6 mice, with superior recognition of  
884 native and denatured targets in WB and ELISA and no discernible background against  
885 unmodified proteins and peptides were selected to perform cell fusion to hybridoma cells.  
886 Evaluation using ELISA resulted in 10 clones that were able to recognize native Cdc42-Thr-AMP  
887 and were subsequently chosen for WB testing as described above. The variation of  
888 performance among the clones proved to be a lot higher than between mice sera samples,  
889 with many clones showing a lack of universal recognition of all targets, high background or  
890 strong differences in strength of recognition depending on the AMPylated protein.

891 Two promising clones with similar very good recognition of all AMPylated proteins in WB  
892 independent of their modified side chain, native recognition of Cdc42-Thr-AMP in ELISA and  
893 low background were selected for subcloning and subsequent production and purification.  
894 One further clone was selected for its unexpected development of a tyrosine-specific  
895 recognition, despite immunization with a threonine-modified peptide. Interestingly, antibody  
896 1G11 lost its clear preference for tyrosine AMPylation after upscaling for production (Figure  
897 2A). However, tyrosine-specific recognition of 1G11 could be sharply enhanced in the  
898 presence of 1 mM MnCl<sub>2</sub> (Figure 3B).

899 In our experience, subcloning and upscaling for antibody production poses the risk of losing  
900 binding abilities. One clone lost its AMPylation recognition abilities during subcloning and had  
901 to be recloned (Switch in isotypes from IgG1 to IgG2b). Another clone lost its performance  
902 during upscaling for antibody production and had to be redone. Therefore, rigorous retesting  
903 after each step is crucial.



904

905

906

907

**Figure S1: Antibody generation and selection of antibodies binding to native epitopes. A** Immunization protocol of mice. Evaluation time points are indicated by circular arrows. **B-D** Evaluation regarding recognition of AMPylation in WB and ELISA of **B** mice sera **C** parental hybridoma clones **D** subclones and **E** produced and purified antibodies.

908 **analytical SEC: supplemental data to Figure 2E**



909

910 **Figure S2:** Native binding of AMPylated antigens by all three monoclonal antibodies as determined by analytical size exclusion  
 911 chromatography. In black antibody alone, in blue antigen alone as indicated, in red co-incubation of antibody and antigen as  
 912 indicated. Shifted antibody peaks (red) upon co-incubation with AMPylated antigens were fractionated and analyzed by silver  
 913 stained SDS PAGE.

914 **MS verification of NMP incorporation**



915

916

917

**Figure S3:** Mass spectrometry confirmation of NMP incorporation by IbpA into Cdc42. Expected molecular weights are indicated above spectra.

918 **Extended data to cell lysates in Figure 4D.**



919

920 **Figure S4:** Using all three monoclonal anti-AMP antibodies on various immortalized and cancer cell lines reveals diverse  
 921 cellular AMPylation. 20 µg cell lysate per lane as indicated were blotted and probed with antibodies as indicated using 1 mM  
 922 MnCl<sub>2</sub> as additive. Afterwards cells were treated with 1 M hydroxylamine for 8 h at room temperature to cleave ADP-  
 923 ribosylation at aspartate and glutamate residues and reprobred with antibody 17G6 using 1 mM MnCl<sub>2</sub>. Antibodies against  
 924 Bip, GAPDH and Histone H3 serve as loading control. 50 ng recombinant Cdc42-Tyr-AMP serve as positive ctrl for AMPylation,  
 925 50 ng recombinant MAR-PARP3 as positive ctrl for ADP-ribosylation and successful hydroxylamine treatment. 50 ng  
 926 unmodified counterparts are included as negative ctrl.

927 **Synthesis of Thr-AMP hapten peptide S2 and Thr peptide S3**



928

929 **Figure S 5:** Solid phase peptide synthesis scheme of peptides **S2** and **S3**.

930 **Thr-AMP hapten peptide Ac-CGAGT(AMP)GAG-NH<sub>2</sub> (S2):**



931

932 Thr-AMP hapten peptide **S2** was synthesized on 100 mg (25  $\mu$ mol) of Tentagel-S-RAM resin.  
933 Yield: 42% (10.0 mg, 10.4  $\mu$ mol).  
934 Analytical HPLC  $R_t$  = 2.651 min (A/B, (98 : 2)  $\rightarrow$  (75 : 25), 500  $\mu$ L/min, 7 min); Preparative HPLC  
935  $R_t$  = 8.945 min (A/B, (97.5 : 2.5)  $\rightarrow$  (50 : 50), 20 mL/min, 10 min).  
936 HR-ESI-MS, m/z: 482.1616 ( $[M+2H]^{2+}$ , calc. 482.1606), 963.3260 ( $[M+H]^+$ , calc. 963.3139).  
937  $^1H$  NMR (600 MHz,  $D_2O$ )  $\delta$ : 8.52 (s, 1H), 8.35 (s, 1H), 4.62-4.59 (m, 1H), 4.43-4.39 (m, 3H), 4.31-  
938 4.27 (m, 2H), 4.18 (q,  $J$  = 7.3 Hz, 1H), 4.04-3.97 (m, 2H), 3.94 ( $s_{br}$ , 2H), 3.87 (s, 2H), 3.84 (s, 2H),  
939 3.79 (d,  $J$  = 5.2 Hz, 2H), 2.83 (d,  $J$  = 6.0 Hz, 2H), 1.98 (s, 3H), 1.31 (d,  $J$  = 7.3 Hz, 3H), 1.28 (d,  $J$  =  
940 7.3 Hz, 3H), 1.22 (d,  $J$  = 6.4 Hz, 3H).  
941  $^{31}P$  NMR (242.9 MHz,  $D_2O$ )  $\delta$ : -1.31 (s).  
942  $^{13}C$  NMR (125.9 MHz,  $D_2O$ )  $\delta$ : 175.50, 175.39, 174.50, 174.13, 172.79, 171.80, 171.61, 171.21,  
943 170.95, 150.25, 148.09, 142.24, 118.64, 118.64, 87.97, 84.01, 83.95, 74.49, 72.02, 71.99,  
944 70.19, 64.72, 64.68, 58.43, 58.38, 55.73, 49.94, 49.55, 42.52, 42.45, 42.34, 42.07, 25.16, 21.69,  
945 17.92, 16.68, 16.19.

946 **Thr peptide Ac-CGAGTGAG-NH<sub>2</sub> (S3):**



947  
948 The threonine peptide **S3** was synthesized on 100 mg (25  $\mu$ mol) of Tentagel-S-RAM resin.  
949 Yield: 28% (4.4 mg, 6.9  $\mu$ mol).  
950 Analytical HPLC  $R_t$  = 2.449 min (A/B, (98 : 2)  $\rightarrow$  (75 : 25), 500  $\mu$ L/min, 7 min); Preparative HPLC  
951  $R_t$  = 7.148 min (A/B, (97.5 : 2.5)  $\rightarrow$  (50 : 50), 20 mL/min, 10 min).  
952 HR-ESI-MS, m/z: 634.2625 ( $[M+H]^+$ , calc. 634.2613), 656.2450 ( $[M+Na]^+$ , calc. 656.2433).  
953  $^1H$  NMR (600 MHz,  $D_2O$ )  $\delta$ : 4.43 (t,  $J$  = 6.1 Hz, 1H), 4.29-4.18 (m, 4H), 3.94-3.88 (m, 6H), 3.81  
954 (d,  $J$  = 5.7 Hz, 2H), 2.85 (d,  $J$  = 6.2 Hz, 2H), 1.98 (s, 3H), 1.33-1.30 (m, 6H), 1.12 (d,  $J$  = 6.4 Hz,  
955 3H).  
956  $^{13}C$  NMR (125.9 MHz,  $D_2O$ )  $\delta$ : 175.60, 175.51, 174.52, 174.13, 172.81, 172.65, 171.86, 171.36,  
957 171.12, 66.97, 59.14, 58.38, 55.73, 49.92, 49.80, 42.47, 42.45, 42.41, 42.07, 25.15, 21.69,  
958 18.63, 16.47, 16.27.  
959

960 **NMR spectra of peptides S2 and S3**

961 **S2 <sup>1</sup>H-NMR**



962

963 **S2 <sup>31</sup>P-NMR**



964

965

966

967

968

969

970

971



984 **S3**  $^{13}\text{C}$ -NMR



985

986 **HPLC chromatograms and HR-ESI-MS spectra of peptides S2 and S3**

987 **S2** HPLC (UV 214 nm)



988

989 **S2** HR-ESI-MS



990

991 **S3** HPLC (UV 214 nm)



992

993

994 **S3** HR-ESI-MS



995

996
